# Supplementary material for: Reductive elimination of C6F5–C6F5 in the reaction of bis(pentafluorophenyl)palladium(ii) complexes with protic acids
Source: Royal Society of Chemistry journal article supplement (doi:10.1039/b802408a), 2008-01-01
Supplement: b802408a.pdf [file b802408a.pdf]

*Supporting Information*

**Reductive Elimination of C<sub>6</sub>F<sub>5</sub>-C<sub>6</sub>F<sub>5</sub> in Reaction of  
Bis(pentafluorophenyl)palladium(II) Complexes with Protic Acids**

Take-aki Koizumi, Atsuko Yamazaki, and Takakazu Yamamoto\*

*Chemical Resources Laboratory, Tokyo Institute of Technology, 4259 Nagatsuta,  
Midori-ku, Yokohama 226-8503, Japan*

## Experimental

**General and Materials.**  $^1\text{H}$  and  $^{19}\text{F}$  NMR spectra were recorded on a JEOL EX-400 spectrometer. IR spectra were recorded on a JASCO IR 810 spectrophotometer. UV-Vis spectra were measured with a Shimadzu UV-2550 UV-visible spectrophotometer.  $[\text{PdCl}_2(\text{cod})]^1$  was prepared according to literature method. Other reagents were purchased from Aldrich co. Ltd. and Tokyo Kasei Kogyo Co. Ltd.

**Synthesis of  $[\text{Pd}(\text{C}_6\text{F}_5)_2(\text{dppb})]$  (5).** To a  $\text{CH}_2\text{Cl}_2$  solution (10 mL) of **1** (100 mg, 0.182 mmol) added 1,4-bis(diphenylphosphino)butane (90 mg, 0.211 mmol) and refluxed for 2 h. The solution was concentrated *ca.* 5 mL, and hexane (20 mL) was added to the solution. The resultant colorless solid was collected by filtration and dried in vacuo. Yield: 146 mg (88%). Anal. Calcd for  $\text{C}_{40}\text{H}_{28}\text{F}_{10}\text{P}_2\text{Pd}$ : C, 55.41; H, 3.26; F, 21.91. Found: C, 55.14; H, 3.37; F, 21.98.  $^1\text{H}$  NMR (400 MHz,  $\text{CDCl}_3$ , 23 °C, TMS)  $\delta$  7.50 (m, 20H, Ph), 2.66 (4H, P- $\underline{\text{CH}_2}$ ), 1.97 (4H, P- $\text{CH}_2$ - $\underline{\text{CH}_2}$ ).  $^{19}\text{F}$   $\{^1\text{H}\}$  NMR (376 MHz,  $\text{CDCl}_3$ , 23 °C,  $\text{CF}_3\text{COOD}$ )  $\delta$  -115.3 (*o*-F), -162.5 (*p*-F), -163.5 (*m*-F).

**Acidolysis of complexes.** General procedure for the acidolysis of the complexes are as follows.

Method A: To a solution of complex **1** (20 mg, 0.037 mmol) in a THF- $d_8$ / $\text{CDCl}_3$  mixture (1/3 v/v, 0.75 mL) was added 0.25 mL of 13.4 M  $\text{HNO}_3$ , and the mixture was stirred vigorously in a capped vial tube at r.t.. After 12 h, the solution was transferred to a NMR tube, and the products were identified by  $^{19}\text{F}$   $\{^1\text{H}\}$  NMR spectroscopy.

Method B: To a solution of complex **1** (20 mg, 0.037 mmol) in THF (3 mL) was added 0.2 mL of conc. HCl, and the mixture was stirred vigorously in a capped vial tube at r.t.. After 48 h, the solvent was removed by evaporation.  $\text{CDCl}_3$  (0.6 mL) was added to the residue

and the solution was transferred to a NMR tube. The products were identified by  $^{19}\text{F}\{^1\text{H}\}$  NMR spectroscopy.

### **X-ray diffraction study**

Crystals of **1**, **2**, **3**, and **5** suitable for crystallography were obtained by recrystallization from THF-hexane mixtures. Crystals were mounted on a glass fiber. Data were collected on a Saturn CCD area detector coupled with a Rigaku/MSM diffractometer with graphite-monochromated Mo-K $\alpha$  radiation ( $\lambda = 0.71070 \text{ \AA}$ ) and processed using Crystal Clear. Space group was determined on the basis of systematic analysis of intensity distribution, and the successful solution and refinement of the structure. The data were collected at a temperature of 173 K to a maximum  $2\theta$  value of  $55.0^\circ$ . A total of 720 oscillation images were collected. A first sweep of data was done using scans from  $-110.0$  to  $70.0^\circ$  in  $0.50$  step, at  $\chi = 45.0^\circ$  and  $\phi = 0.0^\circ$  and a second was done using scans from  $-11.0$  to  $70.0^\circ$  in  $0.50$  step, at  $\chi = 45.0^\circ$  and  $\phi = 90.0^\circ$ . The crystal-to-detector distance was  $45.00 \text{ mm}$  and the detector swing angle was  $20.24^\circ$ . A numerical absorption correction was applied. The data were collected for Lorentz and polarization factors. All the structures were solved using a Crystal Structure package. The non-hydrogen atoms were refined anisotropically by full-matrix least-squares refinement of  $F$ . Refinements were performed anisotropically for all non-hydrogen atoms by the full-matrix least-square method. Hydrogen atoms were placed at the calculated positions and were included in the structure calculation without further refinement of the parameters. Details of crystal parameters and structure refinement are given in Table S4.

1) D. Drew, J. R. Doyle, *Inorg. Synth.* **1972**, *13*, 52.

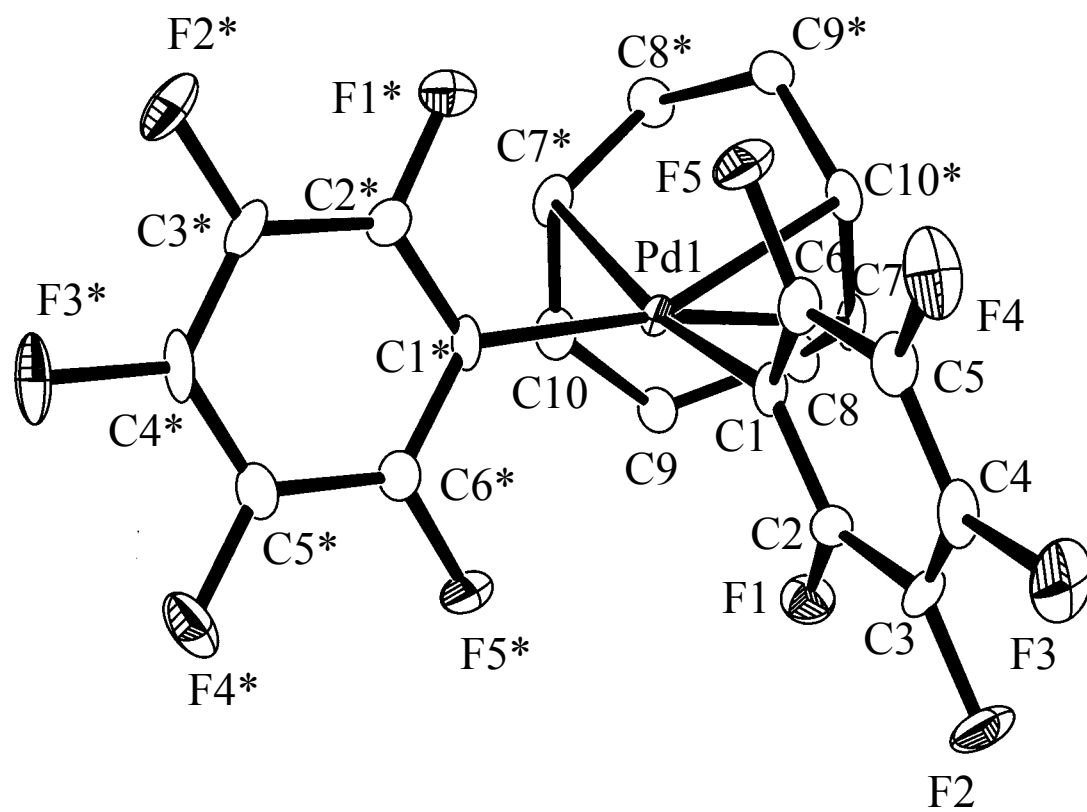

**Figure S1.** ORTEP drawing of [Pd(C<sub>6</sub>F<sub>5</sub>)<sub>2</sub>(cod)] (1) with 50% ellipsoidal level. Hydrogen atoms are omitted for clarity.

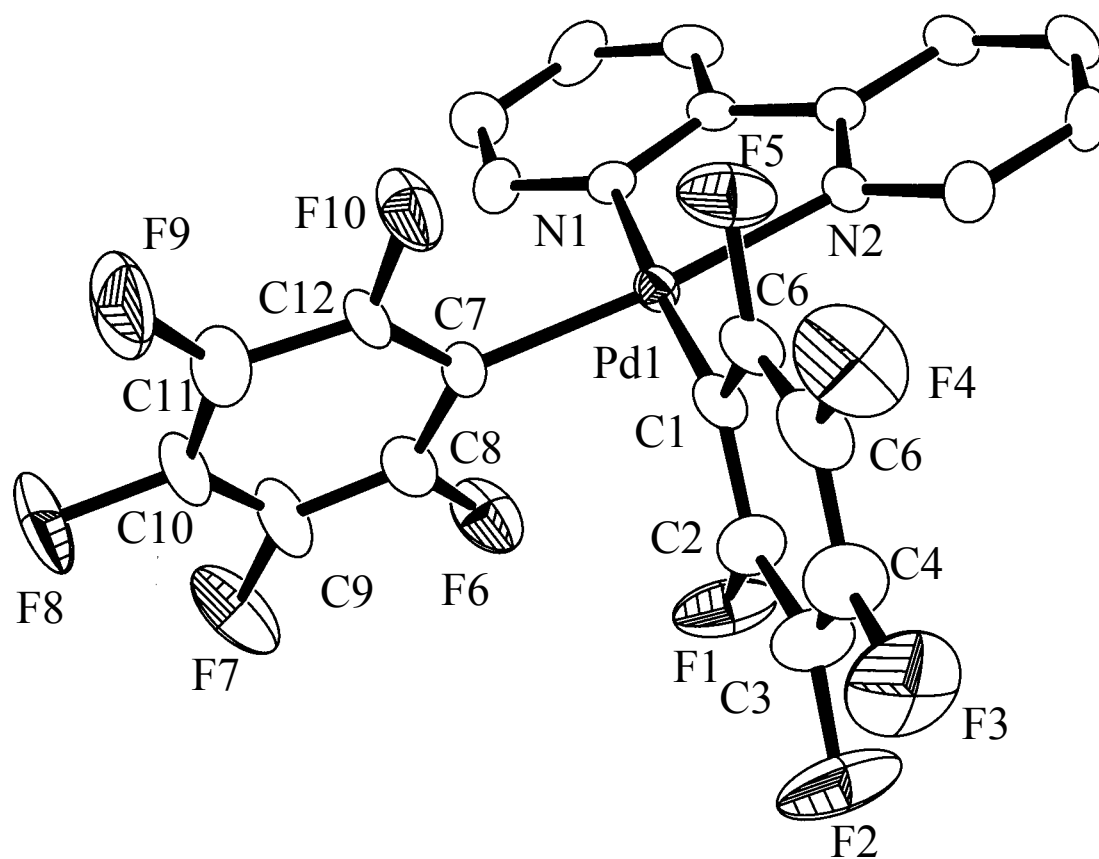

**Figure S2.** ORTEP drawing of [Pd(C<sub>6</sub>F<sub>5</sub>)<sub>2</sub>(bpy)] (2) with 50% ellipsoidal level. Hydrogen atoms are omitted for clarity.

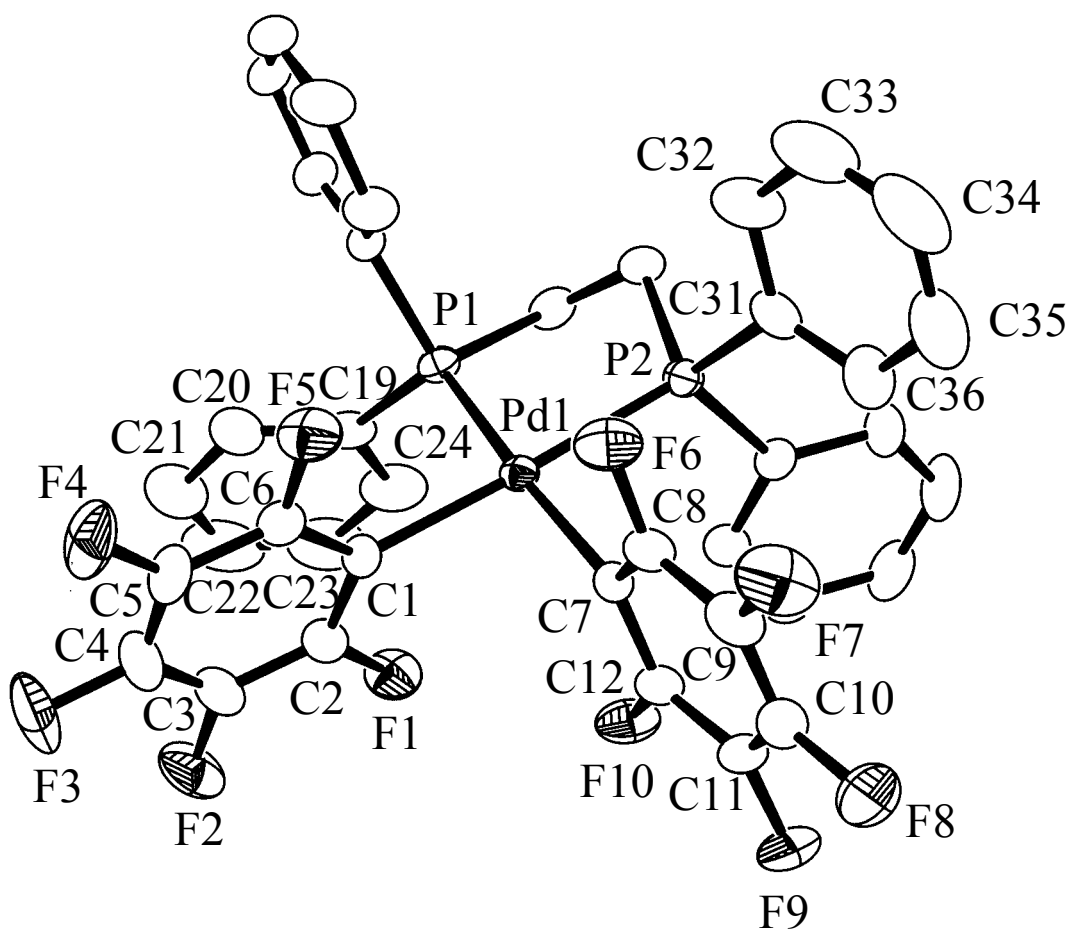

**Figure S3.** ORTEP drawing of [Pd(C<sub>6</sub>F<sub>5</sub>)<sub>2</sub>(dppe)] (3) with 50% ellipsoidal level. Hydrogen atoms are omitted for clarity.

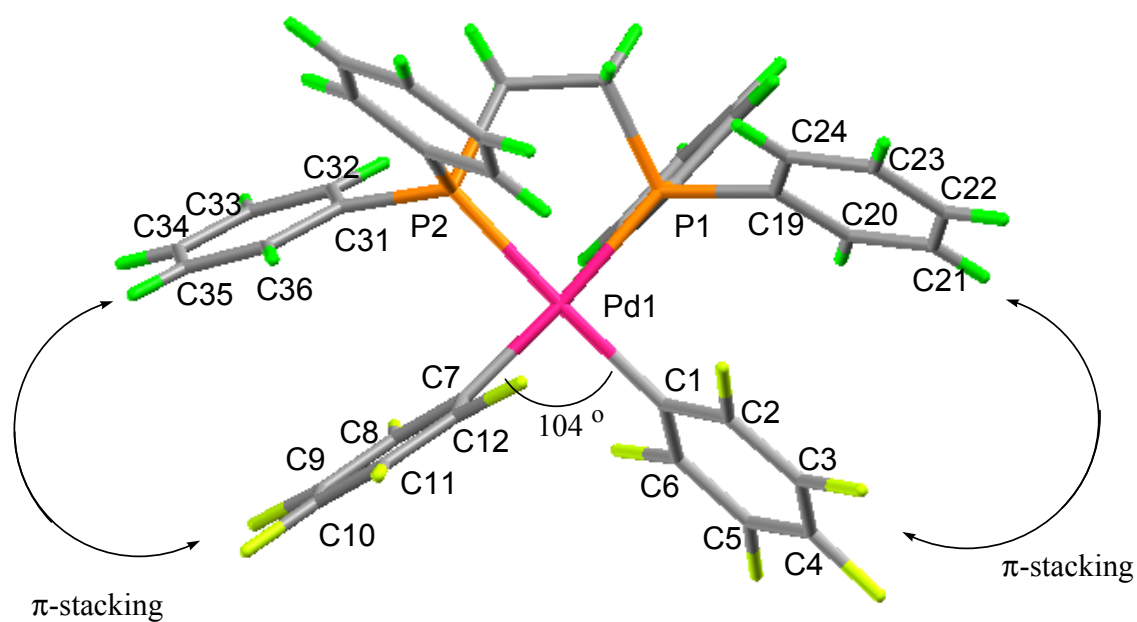

**Figure S4.** Side view of Complex 3. Selected bond lengths and dihedral angles: C2-C20, 3.484(3) Å; C8-C36, 3.325(3) Å; C<sub>6</sub>F<sub>5</sub>(C1-C6)-C<sub>6</sub>H<sub>5</sub>(C19-C24), 18.5(1) °; C<sub>6</sub>F<sub>5</sub>(C7-C12)-C<sub>6</sub>H<sub>5</sub>(C31-C36), 13.1(1) °.

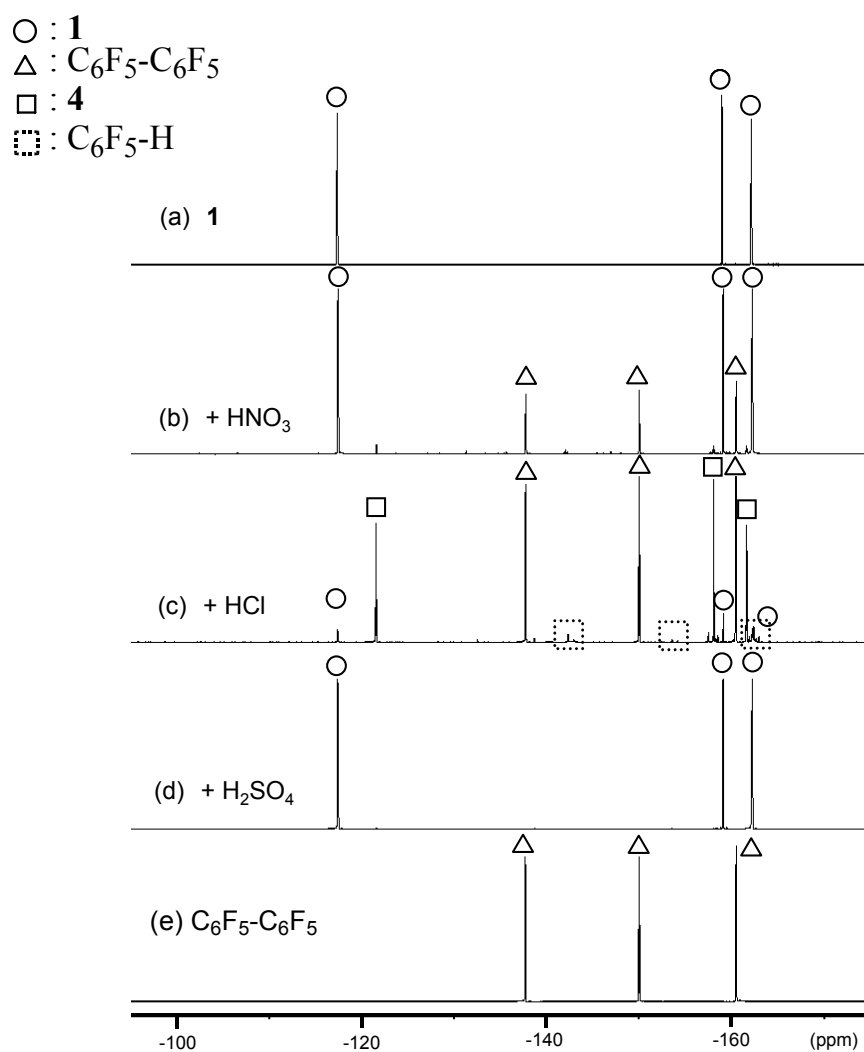

**Figure S5.** (a)  $^{19}\text{F}\{^1\text{H}\}$  NMR spectrum of original **1**. (b)-(c)  $^{19}\text{F}\{^1\text{H}\}$  NMR spectra after the reaction with protic acids: (b) with HNO<sub>3</sub> (13.4 M), (c) with HCl (12 M) and (d) with H<sub>2</sub>SO<sub>4</sub> (2.0 M). Reaction conditions: in THF for 12 h at room temperature. (e)  $^{19}\text{F}\{^1\text{H}\}$  NMR spectrum of C<sub>6</sub>F<sub>5</sub>-C<sub>6</sub>F<sub>5</sub>. Assignment of the peaks is shown by the ○, △, □, and ◻ marks.



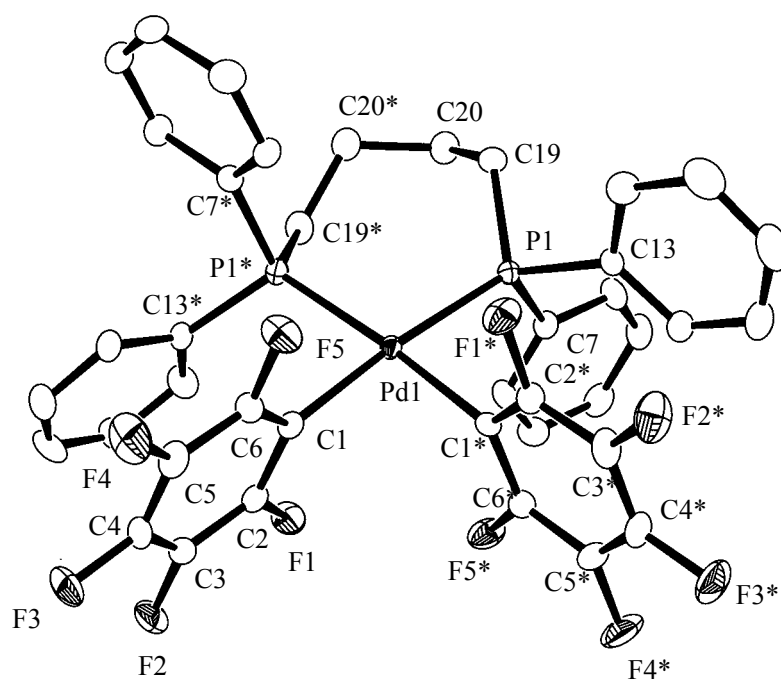

**Figure S6.** Molecular structure of **5** with 50% ellipsoidal level. Hydrogen atoms are omitted for clarity

**Table S1. Selected bond lengths (Å), angles (deg), and a dihedral angle of 1.**

---

|                                 |           |            |          |
|---------------------------------|-----------|------------|----------|
| Pd1-C1                          | 2.022(5)  | Pd1-C7     | 2.322(6) |
| Pd1-C10                         | 2.270(5)  | C8-C9      | 1.533(7) |
| C7-C10*                         | 1.373(11) | C1...C1*   | 2.808(8) |
| C1-Pd1-C1*                      | 88.2(4)   | C7-Pd1-C7* | 86.0(2)  |
| Plane 1(C1-C6)-Plane 1* (C1-C6) |           | 88.9       |          |

---

**Table S2. Selected bond lengths (Å), angles (deg), and a dihedral angle of 2.**

---

|                                                         |          |           |          |
|---------------------------------------------------------|----------|-----------|----------|
| Pd1-C1                                                  | 2.010(5) | Pd1-C7    | 1.995(6) |
| Pd1-N1                                                  | 2.081(5) | Pd1-N2    | 2.084(4) |
| C1...C7                                                 | 2.741(8) |           |          |
| C1-Pd1-C7                                               | 86.4(2)  | N1-Pd1-N2 | 78.5(2)  |
| N1-Pd1-C1                                               | 175.9(2) | N2-Pd1-C7 | 174.8(2) |
| N2-Pd1-C1                                               | 97.9(2)  | N2-Pd1-C7 | 97.3(2)  |
| Plane 1 <sub>(C1-C6)</sub> -Plane 2 <sub>(C7-C12)</sub> |          | 91.0(3)   |          |

---

**Table S3. Selected bond lengths (Å), angles (deg), and a dihedral angle of 3.**

---

|                                                           |           |           |           |
|-----------------------------------------------------------|-----------|-----------|-----------|
| Pd1-C1                                                    | 2.078(2)  | Pd1-C7    | 2.099(2)  |
| Pd1-P1                                                    | 2.2849(5) | Pd1-P2    | 2.2915(5) |
| C1...C7                                                   | 3.028(3)  |           |           |
| C1-Pd1-C7                                                 | 92.94(8)  | P1-Pd1-P2 | 84.87(2)  |
| P1-Pd1-C1                                                 | 91.61(5)  | P2-Pd1-C7 | 90.57(5)  |
| P2-Pd1-C1                                                 | 176.48(5) | P2-Pd1-C7 | 90.57(5)  |
| Plane 1 <sub>(C1-C6)</sub> -Plane 2 <sub>(C7-C12)</sub>   |           | 104.08(8) |           |
| Plane 1 <sub>(C1-C6)</sub> -Plane 4 <sub>(C19-C24)</sub>  |           | 18.6(1)   |           |
| Plane 2 <sub>(C7-C12)</sub> -Plane 6 <sub>(C31-C36)</sub> |           | 13.0(1)   |           |

---

**Table S4. Selected bond lengths (Å), angles (deg), and a dihedral angle of 5.**

---

|                                                         |          |            |           |
|---------------------------------------------------------|----------|------------|-----------|
| Pd1-C1                                                  | 2.063(2) | Pd1-P1     | 2.3202(7) |
| C1...C1*                                                | 2.828(3) |            |           |
| C1-Pd1-C1*                                              | 86.57(9) | P1-Pd1-P1* | 96.70(3)  |
| P1-Pd1-C1                                               | 88.57(9) | P1-Pd1-C1* | 174.89(7) |
| Plane 1 <sub>(C1-C6)</sub> -Plane 2 <sub>(C7-C12)</sub> |          | 86.59      |           |

---

**Table S5. Crystal data and details of the structure refinement of 1, 2, 3, and 5.**

|                                                | <b>1</b>                                           | <b>2</b>                                                         | <b>3</b>                                                          | <b>5</b>                                                          |
|------------------------------------------------|----------------------------------------------------|------------------------------------------------------------------|-------------------------------------------------------------------|-------------------------------------------------------------------|
| Formula                                        | C <sub>20</sub> H <sub>12</sub> F <sub>10</sub> Pd | C <sub>22</sub> H <sub>8</sub> F <sub>10</sub> N <sub>2</sub> Pd | C <sub>38</sub> H <sub>24</sub> F <sub>10</sub> P <sub>2</sub> Pd | C <sub>40</sub> H <sub>28</sub> F <sub>10</sub> P <sub>2</sub> Pd |
| Mol weight                                     | 547.70                                             | 596.70                                                           | 838.94                                                            | 866.99                                                            |
| Crystal system                                 | monoclinic                                         | monoclinic                                                       | monoclinic                                                        | monoclinic                                                        |
| Space group                                    | <i>C2/c</i> (No. 15)                               | <i>P2<sub>1</sub>/c</i> (No. 14)                                 | <i>P2<sub>1</sub>/n</i> (No. 14)                                  | <i>C2</i> (No. 5)                                                 |
| <i>a</i> (Å)                                   | 19.002(10)                                         | 13.450(4)                                                        | 13.599(3)                                                         | 16.622(6)                                                         |
| <i>b</i> (Å)                                   | 8.037(4)                                           | 7.1639(19)                                                       | 16.667(4)                                                         | 9.954(3)                                                          |
| <i>c</i> (Å)                                   | 13.386(7)                                          | 25.045(7)                                                        | 15.613(3)                                                         | 11.013(4)                                                         |
| $\beta$ (°)                                    | 117.9746(17)                                       | 90.3929(13)                                                      | 98.7837(11)                                                       | 109.1665(14)                                                      |
| <i>V</i> (Å <sup>3</sup> )                     | 1805.4(16)                                         | 2413.2(11)                                                       | 3497.2(13)                                                        | 1721.1(10)                                                        |
| <i>Z</i>                                       | 4                                                  | 4                                                                | 4                                                                 | 2                                                                 |
| $\mu$ (cm <sup>-1</sup> )                      | 11.328                                             | 8.578                                                            | 7.033                                                             | 7.175                                                             |
| <i>F</i> (000)                                 | 1056.00                                            | 1160.00                                                          | 1672.00                                                           | 868.00                                                            |
| <i>D</i> <sub>calc</sub> (g cm <sup>-3</sup> ) | 2.004                                              | 1.642                                                            | 1.593                                                             | 1.673                                                             |
| No. unique reflns                              | 3481                                               | 4966                                                             | 7352                                                              | 3234                                                              |
| No. reflns used                                | 3481                                               | 4966                                                             | 7352                                                              | 3234                                                              |
| No. variables                                  | 147                                                | 324                                                              | 484                                                               | 296                                                               |
| <i>R</i> <sub>1</sub> <sup>a</sup>             | 0.0461                                             | 0.0542                                                           | 0.0316                                                            | 0.0160                                                            |
| <i>R</i>                                       | 0.0586                                             | 0.0872                                                           | 0.0399                                                            | 0.0162                                                            |
| <i>R</i> <sub>w</sub> <sup>b</sup>             | 0.0969 <sup>c</sup>                                | 0.0983 <sup>d</sup>                                              | 0.0408 <sup>e</sup>                                               | 0.0186 <sup>f</sup>                                               |

<sup>a</sup>  $R_1 = \Sigma||F_o| - |F_c|| / \Sigma|F_o|$  for  $I > 2.0\sigma(I)$  data. <sup>b</sup>  $R_w = \Sigma[w(F_o^2 - F_c^2)^2] / \Sigma w(F_o^2)^2$ . <sup>c</sup> Weighting scheme  $1/\sigma^2(F_o)$ . <sup>d</sup> Weighting scheme  $1/[0.0010F_o^2 + 3.0000\sigma(F_o^2) + 0.50000]$ . <sup>e</sup> Weighting scheme  $1/[0.0005F_o^2 + 1.0000\sigma(F_o^2)]$ . <sup>f</sup> Weighting scheme  $1/[0.0005F_o^2 + 1.0000\sigma(F_o^2)]$ .
